# Supplementary material
Source: MDPI journal article supplement (https://www.mdpi.com/2073-4441/16/2/249)
Supplement: s1 [file s1]

Supplementary Material for:

**The Responses of Cladoceran Communities to the Single and Simultaneous Effects of  
Environmentally Relevant Increases in Temperature and Phosphorus Concentration in  
Freshwater Ecosystems**

Małgorzata Adamczuk

Department of Hydrobiology and Protection of Ecosystems, University of Life Sciences,

B. Dobrzańskiego 37, 20-262 Lublin, Poland

Table S1. Results of one-way ANOVA for functional and compositional resistance of cladoceran communities. Results are significant at  $p < 0.05$

| Effect              | MS    | $F_{1,2}$ | p-value    |
|---------------------|-------|-----------|------------|
| Resist <sub>D</sub> | 0.159 | 139.120   | $p < 0.01$ |
| Resist <sub>C</sub> | 0.120 | 2.769     | ns         |

ns – not significant

Table S2. Results of Tukey HSD tests showing pairwise comparisons between functional or compositional resistances of cladoceran communities

|                          | Temperature | Phosphorus load |
|--------------------------|-------------|-----------------|
| Resist <sub>D</sub>      |             |                 |
| Phosphorus load          | $p < 0.01$  |                 |
| Temperature x phosphorus | $p < 0.01$  | $p < 0.01$      |

|                          |    |    |
|--------------------------|----|----|
| Resist <sub>C</sub>      |    |    |
| Phosphorus load          | ns |    |
| Temperature x phosphorus | ns | ns |

ns – not significant

Table S3. Results of one-way ANOVA for functional and compositional resilience of cladoceran communities. Results are significant at  $p < 0.05$

| Effect             | MS    | $F_{1,2}$ | p-value    |
|--------------------|-------|-----------|------------|
| Resil <sub>D</sub> | 0.115 | 29.003    | $p < 0.01$ |
| Resil <sub>C</sub> | 0.003 | 34.111    | $p < 0.01$ |

Table S4. Results of Tukey HSD tests showing pairwise comparisons between functional or compositional resistances of cladoceran communities

|                          | Temperature | Phosphorus load |
|--------------------------|-------------|-----------------|
| Resist <sub>D</sub>      |             |                 |
| Phosphorus load          | ns          |                 |
| Temperature x phosphorus | $p < 0.01$  | $p < 0.01$      |

|                          |            |            |
|--------------------------|------------|------------|
| Resist <sub>C</sub>      |            |            |
| Phosphorus load          | ns         |            |
| Temperature x phosphorus | $p < 0.01$ | $p < 0.01$ |

ns – not significant

Table S5. Results of one-way ANOVA for functional and compositional stability of cladoceran communities. Results are significant at  $p < 0.05$

| Effect            | MS    | $F_{1,2}$ | p-value    |
|-------------------|-------|-----------|------------|
| Stab <sub>D</sub> | 0.061 | 1.718     | ns         |
| Stab <sub>C</sub> | 5.013 | 7.053     | $p < 0.01$ |

ns – not significant

Table S6. Results of Tukey HSD tests showing pairwise comparisons between functional or compositional stability of cladoceran communities

|                          | Temperature | Phosphorus load |
|--------------------------|-------------|-----------------|
| Resist <sub>D</sub>      |             |                 |
| Phosphorus load          | ns          |                 |
| Temperature x phosphorus | ns          | ns              |
| Resist <sub>C</sub>      |             |                 |
| Phosphorus load          | $p < 0.01$  |                 |
| Temperature x phosphorus | $p < 0.01$  | ns              |

ns – not significant

Table S7. Results of one-way ANOVA for functional and compositional similarity between disturbed and prior-disturbed cladoceran communities. Results are significant at  $p < 0.05$

| Effect             | MS    | $F_{1,2}$ | p-value    |
|--------------------|-------|-----------|------------|
| Simil <sub>D</sub> | 1.098 | 145.297   | $p < 0.01$ |
| Simil <sub>C</sub> | 0.254 | 32.714    | $p < 0.01$ |

Table S8. Results of Tukey HSD tests showing pairwise comparisons between functional and compositional similarity of cladoceran communities

|                          | Temperature | Phosphorus load |
|--------------------------|-------------|-----------------|
| Simil <sub>D</sub>       |             |                 |
| Phosphorus load          | ns          |                 |
| Temperature x phosphorus | $p < 0.01$  | $p < 0.01$      |
| Simil <sub>C</sub>       |             |                 |
| Phosphorus load          | $p < 0.01$  |                 |
| Temperature x phosphorus | $p < 0.01$  | ns              |

ns – not significant
